# Supplementary material for: Community outbreaks of group A Streptococcus revealed by genome sequencing
Source: PubMed Central journal article supplement (PMC5561225; doi:10.1038/s41598-017-08914-x), 2017-08-17
Supplement: 41598_2017_8914_MOESM1_ESM.pdf [file 41598_2017_8914_MOESM1_ESM.pdf]

## **Supplementary Information for:**

# **Community outbreaks of group A *Streptococcus* revealed by genome sequencing**

Claire E. Turner, Luke Bedford, Nicholas M. Brown, Kim Judge, M. Estée Török, Julian Parkhill,  
Sharon J. Peacock

**Supplementary Figure 1. Four major clades of *emm12* represented in our collection.**

**Supplementary Table 1. List of isolates used in the study**

**Supplementary Table 2. Transcriptional gene regulator mutations; *covR*, *covS*, *rocA*, *rivR***

**Supplementary Table 3. Transcriptional gene regulator mutations; *rgg1*, *rgg2*, *rgg3* and *rgg4***

**Supplementary Table 4. Transcriptional gene regulator mutations; *fasABCX***

**Supplementary Table 5. Short read assembly statistics**

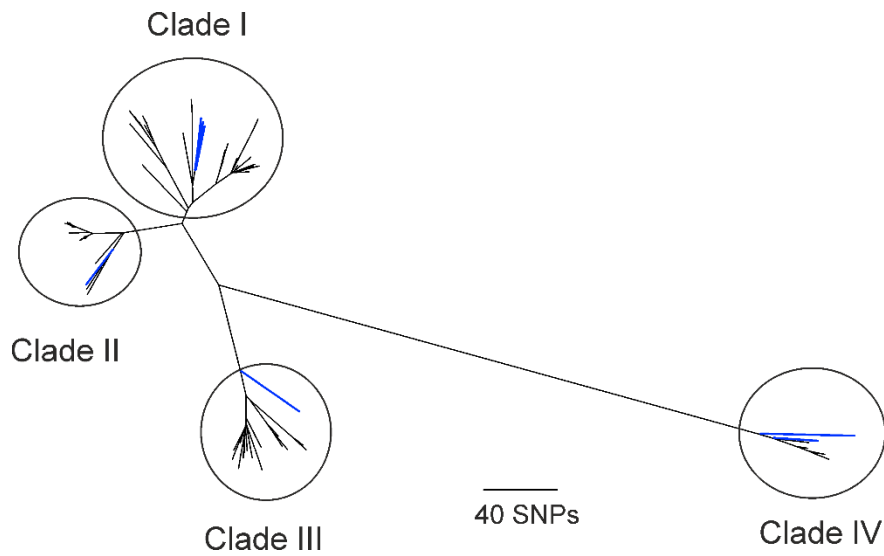

**Supplementary Figure 1. Four major clades of *emm12* represented in our collection.** Our seven *emm12* isolates were mapped to the reference Hong Kong Scarlet fever M12 strain HKU16, along with 132 isolates from Hong Kong collected between 2005-2011<sup>7</sup>. Four main clades identified in the Hong Kong population<sup>7</sup> were represented by at least one isolate from our collection (shown in blue).

**Supplementary Table 1. List of isolates used in the study**

| Sample ID | Referral <sup>b</sup> | Year | Isolate source | Isolate site | emm -type | emm subtype | ST  | emm-cluster | 30D mortality | Antimicrobial testing <sup>a</sup> |     |     |     |     |     |          |
|-----------|-----------------------|------|----------------|--------------|-----------|-------------|-----|-------------|---------------|------------------------------------|-----|-----|-----|-----|-----|----------|
|           |                       |      |                |              |           |             |     |             |               | Pen                                | Ery | Tet | Van | Tei | Cli | I-Cli    |
| GASAR0001 | CUH                   | 2007 | Blood          | Invasive     | 1         | 1           | 28  | A-C3        | No            | S                                  | S   | S   | S   | NT  | NT  | NT       |
| GASAR0002 | CUH                   | 2012 | Blood          | Invasive     | 89        | 89          | 101 | E4          | No            | S                                  | S   | S   | S   | S   | S   | NT       |
| GASAR0003 | CUH                   | 2012 | Blood          | Invasive     | 1         | 1           | 28  | A-C3        | No            | S                                  | S   | S   | S   | S   | S   | NT       |
| GASAR0005 | CUH                   | 2009 | Blood          | Invasive     | 2         | 2           | 55  | E4          | No            | S                                  | S   | S   | S   | S   | S   | NT       |
| GASAR0006 | CUH                   | 2009 | Blood          | Invasive     | 3         | 3.1         | 15  | A-C5        | <b>YES</b>    | S                                  | S   | S   | NT  | NT  | NT  | NT       |
| GASAR0007 | CUH                   | 2008 | Blood          | Invasive     | 87        | 87          | 62  | E3          | No            | S                                  | S   | S   | S   | NT  | NT  | NT       |
| GASAR0008 | CUH                   | 2010 | Blood          | Invasive     | 3         | 3.1         | 15  | A-C5        | No            | S                                  | S   | S   | NT  | NT  | S   | NT       |
| GASAR0009 | CUH                   | 2007 | Blood          | Invasive     | 28        | 28          | 52  | E4          | No            | S                                  | S   | S   | NT  | NT  | S   | NT       |
| GASAR0010 | CUH                   | 2010 | Blood          | Invasive     | 28        | 28          | 52  | E4          | No            | S                                  | S   | S   | NT  | NT  | S   | NT       |
| GASAR0011 | CUH                   | 2008 | Blood          | Invasive     | 1         | 1           | 28  | A-C3        | No            | S                                  | S   | S   | S   | NT  | S   | NT       |
| GASAR0012 | CUH                   | 2009 | Blood          | Invasive     | 44        | 44          | 367 | E3          | No            | S                                  | R   | R   | NT  | S   | S   | Detected |
| GASAR0013 | CUH                   | 2010 | Blood          | Invasive     | 12        | 12          | 36  | A-C4        | No            | S                                  | S   | S   | NT  | NT  | S   | NT       |
| GASAR0014 | CUH                   | 2011 | Blood          | Invasive     | 2         | 2           | 55  | E4          | No            | S                                  | S   | S   | S   | NT  | S   | NT       |
| GASAR0015 | CUH                   | 2011 | Blood          | Invasive     | 3         | 3.1         | 315 | A-C5        | <b>YES</b>    | S                                  | S   | S   | NT  | NT  | S   | NT       |
| GASAR0016 | CUH                   | 2009 | Blood          | Invasive     | 1         | 1           | 28  | A-C3        | No            | S                                  | S   | S   | S   | NT  | S   | NT       |
| GASAR0017 | CUH                   | 2009 | Blood          | Invasive     | 104       | 104         | 789 | E2          | No            | S                                  | S   | S   | NT  | NT  | S   | HT       |
| GASAR0018 | CUH                   | 2009 | Blood          | Invasive     | 44        | 44          | 367 | E3          | No            | S                                  | R   | R   | S   | NT  | R   | NT       |
| GASAR0019 | CUH                   | 2007 | Blood          | Invasive     | 1         | 1           | 28  | A-C3        | <b>YES</b>    | S                                  | S   | S   | S   | NT  | S   | NT       |
| GASAR0020 | GCH                   | 2007 | Blood          | Invasive     | 28        | 28          | 52  | E4          | No            | S                                  | S   | S   | S   | NT  | NT  | NT       |
| GASAR0021 | CUH                   | 2011 | Blood          | Invasive     | 1         | 1.52        | 28  | A-C3        | No            | S                                  | S   | S   | S   | NT  | S   | NT       |
| GASAR0022 | GCH                   | 2012 | Blood          | Invasive     | 1         | 1           | 28  | A-C3        | No            | S                                  | S   | S   | S   | S   | S   | NT       |
| GASAR0023 | GCH                   | 2011 | Blood          | Invasive     | 75        | 75          | 150 | E6          | No            | S                                  | S   | S   | S   | S   | S   | NT       |
| GASAR0024 | GCH                   | 2012 | Blood          | Invasive     | 89        | 89          | 101 | E4          | <b>YES</b>    | S                                  | S   | S   | S   | S   | S   | NT       |
| GASAR0025 | GCH                   | 2012 | Blood          | Invasive     | 75        | 75          | 150 | E6          | No            | S                                  | S   | S   | S   | S   | S   | NT       |
| GASAR0026 | GCH                   | 2012 | Blood          | Invasive     | 4         | 4           | 38  | E6          | No            | S                                  | S   | S   | S   | S   | S   | NT       |

|           |     |      |             |              |    |      |     |      |            |   |   |   |    |    |    |          |
|-----------|-----|------|-------------|--------------|----|------|-----|------|------------|---|---|---|----|----|----|----------|
| GASAR0028 | CUH | 2012 | Blood       | Invasive     | 5  | 5.23 | 99  | Y    | No         | S | S | R | S  | S  | S  | NT       |
| GASAR0029 | CUH | 2010 | Blood       | Invasive     | 1  | 1    | 28  | A-C3 | No         | S | S | S | S  | NT | S  | NT       |
| GASAR0030 | CUH | 2009 | Blood       | Invasive     | 12 | 12   | 36  | A-C4 | No         | S | S | S | S  | NT | S  | NT       |
| GASAR0031 | CUH | 2009 | Blood       | Invasive     | 89 | 89   | 101 | E4   | No         | S | S | S | S  | NT | S  | NT       |
| GASAR0032 | CUH | 2012 | Blood       | Invasive     | 12 | 12   | 36  | A-C4 | <b>YES</b> | S | S | S | S  | S  | S  | NT       |
| GASAR0033 | CUH | 2010 | Blood       | Invasive     | 1  | 1    | 785 | A-C3 | No         | S | S | S | S  | NT | S  | NT       |
| GASAR0034 | CUH | 2009 | Blood       | Invasive     | 3  | 3.1  | 15  | A-C5 | No         | S | S | S | S  | NT | S  | NT       |
| GASAR0035 | CUH | 2007 | Blood       | Invasive     | 43 | 43.5 | 3   | D4   | No         | S | S | R | S  | NT | S  | NT       |
| GASAR0036 | GCH | 2012 | Blood       | Invasive     | 28 | 28   | 52  | E4   | No         | S | S | S | S  | S  | S  | NT       |
| GASAR0037 | CUH | 2011 | Blood       | Invasive     | 89 | 89   | 101 | E4   | No         | S | S | S | S  | S  | S  | NT       |
| GASAR0038 | CUH | 2009 | Blood       | Invasive     | 81 | 81   | 624 | E6   | No         | S | S | S | S  | S  | S  | NT       |
| GASAR0040 | CUH | 2011 | Blood       | Invasive     | 4  | 4    | 39  | E6   | No         | S | S | S | NT | NT | S  | NT       |
| GASAR0042 | CUH | 2009 | Blood       | Invasive     | 1  | 1    | 28  | A-C3 | No         | S | S | S | NT | NT | S  | HT       |
| GASAR0044 | CUH | 2011 | Blood       | Invasive     | 6  | 6.4  | 382 | Y    | No         | S | S | S | NT | NT | S  | NT       |
| GASAR0045 | CUH | 2007 | Blood       | Invasive     | 28 | 28   | 52  | E4   | No         | S | S | S | S  | NT | S  | NT       |
| GASAR0046 | GCH | 2008 | Blood       | Invasive     | 28 | 28   | 52  | E4   | No         | S | S | S | S  | NT | S  | NT       |
| GASAR0047 | CUH | 2010 | Blood       | Invasive     | 1  | 1    | 785 | A-C3 | No         | S | S | S | NT | NT | S  | NT       |
| GASAR0048 | CUH | 2008 | Blood       | Invasive     | 1  | 1    | 28  | A-C3 | No         | S | S | S | S  | NT | NT | NT       |
| GASAR0049 | CUH | 2008 | Blood       | Invasive     | 1  | 1    | 28  | A-C3 | No         | S | S | S | NT | NT | S  | NT       |
| GASAR0050 | CUH | 2008 | Blood       | Invasive     | 89 | 89   | 101 | E4   | No         | S | S | S | S  | NT | S  | NT       |
| GASAR0051 | CUH | 2009 | Blood       | Invasive     | 3  | 3.1  | 15  | A-C5 | No         | S | S | S | NT | NT | S  | HT       |
| GASAR0052 | CUH | 2010 | Blood       | Invasive     | 1  | 1    | 785 | A-C3 | <b>YES</b> | S | S | S | NT | NT | S  | NT       |
| GASAR0053 | CUH | 2010 | Blood       | Invasive     | 12 | 12   | 36  | A-C4 | No         | S | S | S | NT | NT | S  | NT       |
| GASAR0054 | GP  | 2012 | SSTI        | Non-invasive | 28 | 28   | 787 | E4   | No         | S | S | S | S  | S  | S  | NT       |
| GASAR0055 | GP  | 2012 | SSTI        | Non-invasive | 28 | 28   | 52  | E4   | No         | S | S | S | S  | S  | S  | NT       |
| GASAR0057 | CUH | 2009 | Respiratory | Non-invasive | 89 | 89   | 101 | E4   | No         | S | S | S | NT | NT | S  | NT       |
| GASAR0058 | CUH | 2010 | SSTI        | Non-invasive | 89 | 89   | 101 | E4   | No         | S | S | S | NT | NT | S  | NT       |
| GASAR0059 | GP  | 2012 | SSTI        | Non-invasive | 2  | 2    | 55  | E4   | No         | S | S | S | S  | S  | S  | NT       |
| GASAR0061 | CUH | 2011 | Unspecified | Invasive     | 58 | 58   | 176 | E3   | No         | S | R | R | S  | S  | S  | Detected |

|           |     |      |             |              |    |     |     |      |            |   |   |   |    |    |   |          |
|-----------|-----|------|-------------|--------------|----|-----|-----|------|------------|---|---|---|----|----|---|----------|
| GASAR0062 | CUH | 2009 | SSTI        | Non-invasive | 3  | 3.1 | 15  | A-C5 | <b>YES</b> | S | S | S | NT | NT | S | NT       |
| GASAR0063 | GP  | 2012 | SSTI        | Non-invasive | 75 | 75  | 150 | E6   | No         | S | S | S | S  | S  | S | NT       |
| GASAR0064 | CUH | 2010 | SSTI        | Non-invasive | 89 | 89  | 101 | E4   | No         | S | S | S | NT | NT | S | NT       |
| GASAR0065 | CUH | 2012 | SSTI        | Non-invasive | 1  | 1.6 | 28  | A-C3 | No         | S | S | S | S  | S  | S | NT       |
| GASAR0067 | CUH | 2010 | SSTI        | Invasive     | 28 | 28  | 52  | E4   | No         | S | S | S | NT | NT | S | NT       |
| GASAR0068 | CUH | 2012 | Throat      | Non-invasive | 2  | 2   | 55  | E4   | No         | S | S | S | S  | S  | S | NT       |
| GASAR0069 | GCH | 2012 | Respiratory | Invasive     | 1  | 1   | 28  | A-C3 | No         | S | S | S | S  | S  | S | NT       |
| GASAR0070 | GCH | 2012 | Throat      | Non-invasive | 6  | 6   | 382 | Y    | No         | S | S | S | S  | S  | S | NT       |
| GASAR0072 | GCH | 2012 | Throat      | Non-invasive | 6  | 6.4 | 382 | Y    | No         | S | S | S | S  | S  | S | NT       |
| GASAR0073 | GCH | 2012 | Throat      | Non-invasive | 4  | 4   | 786 | E6   | No         | S | S | S | S  | S  | S | NT       |
| GASAR0076 | GCH | 2012 | SSTI        | Non-invasive | 22 | 22  | 46  | E4   | No         | S | S | S | S  | S  | S | NT       |
| GASAR0077 | GCH | 2012 | SSTI        | Non-invasive | 28 | 28  | 52  | E4   | No         | S | S | S | S  | S  | S | NT       |
| GASAR0081 | GP  | 2012 | SSTI        | Non-invasive | 12 | 12  | 36  | A-C4 | No         | S | S | S | S  | S  | S | NT       |
| GASAR0082 | GCH | 2013 | SSTI        | Non-invasive | 1  | 1   | 28  | A-C3 | No         | S | S | S | S  | S  | S | NT       |
| GASAR0083 | GP  | 2009 | SSTI        | Non-invasive | 44 | 44  | 367 | E3   | No         | S | R | R | NT | NT | S | Detected |
| GASAR0085 | CUH | 2012 | SSTI        | Non-invasive | 75 | 75  | 150 | E6   | No         | S | R | R | S  | S  | R | NT       |
| GASAR0086 | CUH | 2011 | Bone+joint  | Invasive     | 1  | 1   | 28  | A-C3 | No         | S | S | S | S  | S  | S | NT       |
| GASAR0087 | CUH | 2008 | Respiratory | Non-invasive | 6  | 6   | 382 | Y    | No         | S | S | S | NT | NT | S | NT       |
| GASAR0089 | CUH | 2009 | SSTI        | Invasive     | 75 | 75  | 150 | E6   | No         | S | S | S | NT | NT | S | NT       |
| GASAR0090 | CUH | 2012 | Unspecified | Non-invasive | 1  | 1   | 28  | A-C3 | No         | S | S | S | S  | S  | S | NT       |
| GASAR0091 | CUH | 2007 | SSTI        | Non-invasive | 89 | 89  | 101 | E4   | No         | S | S | S | NT | NT | S | NT       |
| GASAR0092 | CUH | 2012 | Throat      | Non-invasive | 1  | 1   | 28  | A-C3 | No         | S | S | S | S  | S  | S | NT       |
| GASAR0093 | CUH | 2011 | SSTI        | Invasive     | 1  | 1   | 28  | A-C3 | No         | S | S | S | NT | NT | S | NT       |
| GASAR0095 | GP  | 2012 | SSTI        | Non-invasive | 28 | 28  | 52  | E4   | No         | S | S | S | S  | S  | S | NT       |
| GASAR0096 | CUH | 2012 | SSTI        | Non-invasive | 3  | 3.1 | 15  | A-C5 | No         | S | S | S | S  | S  | S | NT       |
| GASAR0098 | CUH | 2011 | SSTI        | Invasive     | 1  | 1.6 | 28  | A-C3 | No         | S | S | S | NT | NT | S | NT       |
| GASAR0099 | CUH | 2007 | Unspecified | Non-invasive | 1  | 1   | 28  | A-C3 | No         | S | S | S | NT | NT | S | NT       |
| GASAR0100 | CUH | 2011 | Respiratory | Non-invasive | 89 | 89  | 101 | E4   | No         | S | S | S | S  | S  | S | NT       |
| GASAR0101 | CUH | 2008 | Other       | Invasive     | 6  | 6   | 382 | Y    | No         | S | S | S | NT | S  | S | NT       |

|           |     |      |             |              |     |      |     |      |    |   |   |   |    |    |   |    |
|-----------|-----|------|-------------|--------------|-----|------|-----|------|----|---|---|---|----|----|---|----|
| GASAR0102 | CUH | 2008 | SSTI        | Non-invasive | 4   | 4    | 39  | E6   | No | S | S | S | NT | NT | S | NT |
| GASAR0103 | CUH | 2010 | Respiratory | Invasive     | 12  | 12   | 36  | A-C4 | No | S | S | S | NT | NT | S | NT |
| GASAR0104 | CUH | 2010 | Respiratory | Invasive     | 12  | 12   | 36  | A-C4 | No | S | S | S | NT | NT | S | NT |
| GASAR0105 | CUH | 2011 | SSTI        | Non-invasive | 134 | 134  | 790 | E5   | No | S | S | R | NT | NT | S | NT |
| GASAR0106 | CUH | 2011 | Unspecified | Non-invasive | 6   | 6    | 382 | Y    | No | S | S | S | NT | NT | S | NT |
| GASAR0109 | CUH | 2012 | Throat      | Non-invasive | 75  | 75   | 788 | E6   | No | S | S | S | S  | S  | S | NT |
| GASAR0110 | CUH | 2012 | Unspecified | Non-invasive | 1   | 1    | 28  | A-C3 | No | S | S | S | S  | S  | S | NT |
| GASAR0111 | GCH | 2010 | Unspecified | Non-invasive | 28  | 28   | 52  | E4   | No | S | S | S | NT | NT | S | NT |
| GASAR0112 | GP  | 2012 | SSTI        | Non-invasive | 1   | 1.52 | 28  | A-C3 | No | S | S | S | S  | S  | S | NT |
| GASAR0113 | GP  | 2012 | Throat      | Non-invasive | 28  | 28   | 52  | E4   | No | S | S | S | S  | S  | S | NT |

<sup>a</sup> Pen; Penicillin, Ery; Erythromycin, Tet; Tetracycline, Van; Vancomycin, Tec; Teicoplanin, Cli; Clindamycin, I-Cli; Inducible clindamycin. NT;

not tested.

<sup>b</sup> Referral from Cambridge University Hospital (CUH), Local tertiary and general care hospitals (GCH), General Practice (GP).

**Supplementary Table 2. Transcriptional gene regulator mutations; *covR*, *covS*, *rocA*, *rivR***

| Strain    | <i>emm</i><br>-type | <i>covR</i>          |             |            | <i>covS</i>          |                 |            | <i>rocA</i>          |                |            | <i>rivR</i>          |       |        |
|-----------|---------------------|----------------------|-------------|------------|----------------------|-----------------|------------|----------------------|----------------|------------|----------------------|-------|--------|
|           |                     | <i>emm</i> -specific | Other       | Mutant     | <i>emm</i> -specific | Other           | Mutant     | <i>emm</i> -specific | Other          | Mutant     | <i>emm</i> -specific | Other | Mutant |
| GASAR0001 | 1                   | -                    | -           |            | I332V <sup>a</sup>   | -               |            | Q259R                | -              |            | E420K                | -     |        |
| GASAR0003 | 1                   | -                    | -           |            | I332V                | -               |            | Q259R                | -              |            | E420K                | -     |        |
| GASAR0011 | 1                   | -                    | -           |            | I332V                | <b>390-STOP</b> | <b>Yes</b> | Q259R                | -              |            | E420K                | -     |        |
| GASAR0016 | 1                   | -                    | -           |            | I332V                | -               |            | Q259R                | -              |            | E420K                | -     |        |
| GASAR0019 | 1                   | -                    | -           |            | I332V                | -               |            | Q259R                | -              |            | E420K                | -     |        |
| GASAR0021 | 1                   | -                    | -           |            | I332V                | <b>T214P</b>    | <b>Yes</b> | Q259R                | -              |            | E420K                | -     |        |
| GASAR0022 | 1                   | -                    | -           |            | I332V                | -               |            | Q259R                | -              |            | E420K                | -     |        |
| GASAR0029 | 1                   | -                    | -           |            | I332V                | -               |            | Q259R                | -              |            | E420K                | -     |        |
| GASAR0033 | 1                   | -                    | -           |            | I332V                | -               |            | Q259R                | <b>32-STOP</b> | <b>Yes</b> | E420K                | -     |        |
| GASAR0042 | 1                   | -                    | -           |            | I332V                | -               |            | Q259R                | -              |            | E420K                | -     |        |
| GASAR0047 | 1                   | -                    | -           |            | I332V                | -               |            | Q259R                | -              |            | E420K                | -     |        |
| GASAR0048 | 1                   | -                    | -           |            | I332V                | -               |            | Q259R                | -              |            | E420K                | -     |        |
| GASAR0049 | 1                   | -                    | -           |            | I332V                | -               |            | Q259R                | -              |            | E420K                | -     |        |
| GASAR0052 | 1                   | -                    | -           |            | I332V                | -               |            | Q259R                | -              |            | E420K                | -     |        |
| GASAR0065 | 1                   | -                    | -           |            | I332V                | -               |            | Q259R                | -              |            | E420K                | -     |        |
| GASAR0069 | 1                   | -                    | -           |            | I332V                | -               |            | Q259R                | -              |            | E420K                | -     |        |
| GASAR0082 | 1                   | -                    | -           |            | I332V                | -               |            | Q259R                | -              |            | E420K                | -     |        |
| GASAR0086 | 1                   | -                    | -           |            | I332V                | -               |            | Q259R                | -              |            | E420K                | -     |        |
| GASAR0090 | 1                   | -                    | -           |            | I332V                | -               |            | Q259R                | -              |            | E420K                | -     |        |
| GASAR0092 | 1                   | -                    | -           |            | I332V                | -               |            | Q259R                | -              |            | E420K                | -     |        |
| GASAR0093 | 1                   | -                    | -           |            | I332V                | -               |            | Q259R                | -              |            | E420K                | -     |        |
| GASAR0098 | 1                   | -                    | -           |            | I332V                | -               |            | Q259R                | -              |            | E420K                | -     |        |
| GASAR0099 | 1                   | -                    | -           |            | I332V                | -               |            | Q259R                | -              |            | E420K                | -     |        |
| GASAR0110 | 1                   | -                    | -           |            | I332V                | -               |            | Q259R                | -              |            | E420K                | -     |        |
| GASAR0112 | 1                   | -                    | -           |            | I332V                | -               |            | Q259R                | -              |            | E420K                | -     |        |
| GASAR0005 | 2                   | -                    | <b>R66C</b> | <b>Yes</b> | -                    | -               |            | -                    | -              |            | K101R; M345K         | -     |        |

|           |   |   |   |                     |                 |                |                                             |   |                 |              |
|-----------|---|---|---|---------------------|-----------------|----------------|---------------------------------------------|---|-----------------|--------------|
| GASAR0014 | 2 | - | - | -                   | <b>E317D</b>    | <b>Yes</b>     | -                                           | - | K101R; M345K    | -            |
| GASAR0059 | 2 | - | - | -                   | -               | -              | -                                           | - | K101R; M345K    | -            |
| GASAR0068 | 2 | - | - | -                   | -               | -              | -                                           | - | K101R; M345K    | -            |
| GASAR0006 | 3 | - | - | -                   | -               | -              | I203N, L247F, D396N, I404T, <b>417-STOP</b> | - | <b>89-STOP</b>  | -            |
| GASAR0008 | 3 | - | - | -                   | <b>46-STOP</b>  | <b>Yes</b>     | I203N, L247F, D396N, I404T, <b>417-STOP</b> | - | <b>89-STOP</b>  | -            |
| GASAR0015 | 3 | - | - | -                   | -               | -              | I203N, L247F, D396N, I404T, <b>417-STOP</b> | - | <b>89-STOP</b>  | -            |
| GASAR0034 | 3 | - | - | -                   | <b>221-STOP</b> | <b>Yes</b>     | I203N, L247F, D396N, I404T, <b>417-STOP</b> | - | <b>89-STOP</b>  | -            |
| GASAR0051 | 3 | - | - | -                   | -               | -              | I203N, L247F, D396N, I404T, <b>417-STOP</b> | - | <b>89-STOP</b>  | -            |
| GASAR0062 | 3 | - | - | -                   | -               | -              | I203N, L247F, D396N, I404T, <b>417-STOP</b> | - | <b>89-STOP</b>  | -            |
| GASAR0096 | 3 | - | - | -                   | <b>407-STOP</b> | <b>Yes</b>     | I203N, L247F, D396N, I404T, <b>417-STOP</b> | - | <b>89-STOP</b>  | -            |
| GASAR0026 | 4 | - | - | K498N               | -               | -              | V182I, D396N, I404T                         | - | <b>192-STOP</b> | -            |
| GASAR0040 | 4 | - | - | K498N               | -               | -              | V182I, D396N, I404T                         | - | <b>192-STOP</b> | -            |
| GASAR0073 | 4 | - | - | K498N               | -               | -              | V182I, D396N, I404T                         | - | <b>192-STOP</b> | -            |
| GASAR0102 | 4 | - | - | K498N               | -               | -              | V182I, D396N, I404T                         | - | <b>192-STOP</b> | -            |
| GASAR0028 | 5 | - | - | K498N               | -               | ? <sup>b</sup> | V47A, D396N, I404T, P405S                   | - | ?               | Q281H; G465S |
| GASAR0044 | 6 | - | - | M228I, G357D, K498N | -               | -              | V346L, D396N, I404T                         | - | -               | -            |
| GASAR0070 | 6 | - | - | M228I, G357D, K498N | -               | -              | V346L, D396N, I404T                         | - | -               | -            |
| GASAR0072 | 6 | - | - | M228I, G357D, K498N | -               | -              | V346L, D396N, I404T                         | - | -               | -            |
| GASAR0087 | 6 | - | - | M228I, G357D, K498N | -               | -              | V346L, D396N, I404T                         | - | -               | -            |
| GASAR0101 | 6 | - | - | M228I, G357D, K498N | -               | -              | V346L, D396N, I404T                         | - | -               | -            |
| GASAR0106 | 6 | - | - | M228I, G357D, K498N | -               | -              | V346L, D396N, I404T                         | - | -               | -            |



|           |    |   |   |              |              |            |                        |   |   |                        |   |                        |
|-----------|----|---|---|--------------|--------------|------------|------------------------|---|---|------------------------|---|------------------------|
| GASAR0013 | 12 | - | - | -            | -            | -          | -                      | - | - | V500I                  | - |                        |
| GASAR0030 | 12 | - | - | -            | -            | -          | -                      | - | - | V500I                  | - |                        |
| GASAR0032 | 12 | - | - | -            | -            | -          | -                      | - | - | V500I                  | - |                        |
| GASAR0053 | 12 | - | - | -            | -            | -          | -                      | - | - | V500I                  | - |                        |
| GASAR0081 | 12 | - | - | -            | -            | -          | -                      | - | - | V500I                  | - |                        |
| GASAR0103 | 12 | - | - | -            | -            | -          | -                      | - | - | V500I                  | - |                        |
| GASAR0104 | 12 | - | - | -            | -            | -          | -                      | - | - | V500I                  | - |                        |
| GASAR0076 | 22 | - | - | E265D, E428K |              | ?          | V333A                  | - | ? | Q487H                  | - |                        |
| GASAR0009 | 28 | - | - | E226G        | -            |            | D396N, I404T           | - |   | Q278R; R279Q;<br>A407G | - |                        |
| GASAR0010 | 28 | - | - | E226G        | -            |            | D396N, I404T           | - |   | Q278R; R279Q;<br>A407G | - | <b>M91V</b> <b>Yes</b> |
| GASAR0020 | 28 | - | - | E226G        | -            |            | D396N, I404T           | - |   | Q278R; R279Q;<br>A407G | - |                        |
| GASAR0036 | 28 | - | - | E226G        | -            |            | D396N, I404T           | - |   | Q278R; R279Q;<br>A407G | - |                        |
| GASAR0045 | 28 | - | - | E226G        | -            |            | D396N, I404T           | - |   | Q278R; R279Q;<br>A407G | - |                        |
| GASAR0046 | 28 | - | - | E226G        | <b>P220S</b> | <b>Yes</b> | D396N, I404T           | - |   | Q278R; R279Q;<br>A407G | - |                        |
| GASAR0054 | 28 | - | - | E226G        | -            |            | D396N, I404T           | - |   | Q278R; R279Q;<br>A407G | - |                        |
| GASAR0055 | 28 | - | - | E226G        | -            |            | D396N, I404T           | - |   | Q278R; R279Q;<br>A407G | - |                        |
| GASAR0067 | 28 | - | - | E226G        | -            |            | D396N, I404T           | - |   | Q278R; R279Q;<br>A407G | - |                        |
| GASAR0077 | 28 | - | - | E226G        | -            |            | D396N, I404T           | - |   | Q278R; R279Q;<br>A407G | - |                        |
| GASAR0095 | 28 | - | - | E226G        | -            |            | D396N, I404T           | - |   | Q278R; R279Q;<br>A407G | - |                        |
| GASAR0111 | 28 | - | - | E226G        | <b>R104C</b> | <b>Yes</b> | D396N, I404T           | - |   | Q278R; R279Q;<br>A407G | - |                        |
| GASAR0113 | 28 | - | - | E226G        | -            |            | D396N, I404T           | - |   | Q278R; R279Q;<br>A407G | - |                        |
| GASAR0035 | 43 | - | - | -            | -            |            | V182I, D396N,<br>I404T | - | ? | K101R; G455S           | - | ?                      |
| GASAR0012 | 44 | - | - | P493A        | -            |            | F349L                  | - |   | -                      | - |                        |
| GASAR0018 | 44 | - | - | P493A        | -            |            | F349L                  | - |   | -                      | - |                        |
| GASAR0083 | 44 | - | - | P493A        | -            |            | F349L                  | - |   | -                      | - |                        |
| GASAR0061 | 58 | - | - | -            | -            |            | I203N, D396N,<br>I404T | - | ? | Q281H                  | - | ?                      |

|           |     |   |   |       |                 |            |              |   |   |              |     |
|-----------|-----|---|---|-------|-----------------|------------|--------------|---|---|--------------|-----|
| GASAR0023 | 75  | - | - | S337L | -               | -          | -            | - | - | K101R; M345K | -   |
| GASAR0025 | 75  | - | - | S337L | <b>46-STOP</b>  | <b>Yes</b> | -            | - | - | K101R; M345K | -   |
| GASAR0063 | 75  | - | - | S337L | -               | -          | -            | - | - | K101R; M345K | -   |
| GASAR0085 | 75  | - | - | S337L | -               | -          | -            | - | - | K101R; M345K | -   |
| GASAR0089 | 75  | - | - | S337L | <b>496-STOP</b> | <b>Yes</b> | -            | - | - | K101R; M345K | -   |
| GASAR0109 | 75  | - | - | S337L | -               | -          | -            | - | - | K101R; M345K | -   |
| GASAR0038 | 81  | - | - | -     | -               | -          | -            | - | - | D193G        | - ? |
| GASAR0007 | 87  | - | - | -     | -               | -          | D310A, L302S | - | ? | -            | -   |
| GASAR0002 | 89  | - | - | -     | -               | -          | -            | - | - | -            | -   |
| GASAR0024 | 89  | - | - | -     | -               | -          | -            | - | - | -            | -   |
| GASAR0031 | 89  | - | - | -     | <b>46-STOP</b>  | <b>Yes</b> | -            | - | - | -            | -   |
| GASAR0037 | 89  | - | - | -     | -               | -          | -            | - | - | -            | -   |
| GASAR0050 | 89  | - | - | -     | -               | -          | -            | - | - | -            | -   |
| GASAR0057 | 89  | - | - | -     | -               | -          | -            | - | - | -            | -   |
| GASAR0058 | 89  | - | - | -     | -               | -          | -            | - | - | -            | -   |
| GASAR0064 | 89  | - | - | -     | -               | -          | -            | - | - | -            | -   |
| GASAR0091 | 89  | - | - | -     | <b>P136S</b>    | <b>Yes</b> | -            | - | - | -            | -   |
| GASAR0100 | 89  | - | - | -     | -               | -          | -            | - | - | -            | -   |
| GASAR0017 | 104 | - | - | -     | <b>46-STOP</b>  | <b>Yes</b> | D310A, L302S | - | ? | K101R        | - ? |
| GASAR0105 | 134 | - | - | -     | -               | -          | I404T        | - | ? | M345K        | - ? |

<sup>a</sup> Amino acid change at the indicated residue compared to the amino acid sequences for each gene obtained from all the isolates

<sup>b</sup> ?; Too few strains representing the *emm*-type to determine between *emm*-type associated variations and additional mutations.

**Supplementary Table 3. Transcriptional gene regulator mutations; *rgg1*, *rgg2*, *rgg3* and *rgg4***

| Strain    | <i>emm</i><br>-type | <i>rgg1 (ropB)</i>   |             |            | <i>rgg2</i>          |       |        | <i>rgg3</i>          |       |        | <i>rgg4</i>       |                      |       |        |
|-----------|---------------------|----------------------|-------------|------------|----------------------|-------|--------|----------------------|-------|--------|-------------------|----------------------|-------|--------|
|           |                     | <i>emm</i> -specific | Other       | Mutant     | <i>emm</i> -specific | Other | Mutant | <i>emm</i> -specific | Other | Mutant | Type <sup>a</sup> | <i>emm</i> -specific | Other | Mutant |
| GASAR0001 | 1                   | -                    | -           |            | -                    | -     |        | -                    | -     |        | 1                 | -                    | -     |        |
| GASAR0003 | 1                   | -                    | -           |            | -                    | -     |        | -                    | -     |        | 1                 | -                    | -     |        |
| GASAR0011 | 1                   | -                    | -           |            | -                    | -     |        | -                    | -     |        | 1                 | -                    | -     |        |
| GASAR0016 | 1                   | -                    | <b>D40G</b> | <b>Yes</b> | -                    | -     |        | -                    | -     |        | 1                 | -                    | -     |        |
| GASAR0019 | 1                   | -                    | -           |            | -                    | -     |        | -                    | -     |        | 1                 | -                    | -     |        |
| GASAR0021 | 1                   | -                    | -           |            | -                    | -     |        | -                    | -     |        | 1                 | -                    | -     |        |
| GASAR0022 | 1                   | -                    | -           |            | -                    | -     |        | -                    | -     |        | 1                 | -                    | -     |        |
| GASAR0029 | 1                   | -                    | -           |            | -                    | -     |        | -                    | -     |        | 1                 | -                    | -     |        |
| GASAR0033 | 1                   | -                    | -           |            | -                    | -     |        | -                    | -     |        | 1                 | -                    | -     |        |
| GASAR0042 | 1                   | -                    | -           |            | -                    | -     |        | -                    | -     |        | 1                 | -                    | -     |        |
| GASAR0047 | 1                   | -                    | -           |            | -                    | -     |        | -                    | -     |        | 1                 | -                    | -     |        |
| GASAR0048 | 1                   | -                    | -           |            | -                    | -     |        | -                    | -     |        | 1                 | -                    | -     |        |
| GASAR0049 | 1                   | -                    | -           |            | -                    | -     |        | -                    | -     |        | 1                 | -                    | -     |        |
| GASAR0052 | 1                   | -                    | -           |            | -                    | -     |        | -                    | -     |        | 1                 | -                    | -     |        |
| GASAR0065 | 1                   | -                    | -           |            | -                    | -     |        | -                    | -     |        | 1                 | -                    | -     |        |
| GASAR0069 | 1                   | -                    | -           |            | -                    | -     |        | -                    | -     |        | 1                 | -                    | -     |        |
| GASAR0082 | 1                   | -                    | -           |            | -                    | -     |        | -                    | -     |        | 1                 | -                    | -     |        |
| GASAR0086 | 1                   | -                    | <b>E8G</b>  | <b>Yes</b> | -                    | -     |        | -                    | -     |        | 1                 | -                    | -     |        |
| GASAR0090 | 1                   | -                    | -           |            | -                    | -     |        | -                    | -     |        | 1                 | -                    | -     |        |
| GASAR0092 | 1                   | -                    | -           |            | -                    | -     |        | -                    | -     |        | 1                 | -                    | -     |        |
| GASAR0093 | 1                   | -                    | -           |            | -                    | -     |        | -                    | -     |        | 1                 | -                    | -     |        |
| GASAR0098 | 1                   | -                    | -           |            | -                    | -     |        | -                    | -     |        | 1                 | -                    | -     |        |
| GASAR0099 | 1                   | -                    | -           |            | -                    | -     |        | -                    | -     |        | 1                 | -                    | -     |        |
| GASAR0110 | 1                   | -                    | -           |            | -                    | -     |        | -                    | -     |        | 1                 | -                    | -     |        |
| GASAR0112 | 1                   | -                    | -           |            | -                    | -     |        | -                    | -     |        | 1                 | -                    | -     |        |
| GASAR0005 | 2                   | -                    | -           |            | E239K; M241I         | -     |        | A7V                  | -     |        | 2                 | V183A                | -     |        |

|           |    |       |   |              |                        |              |   |       |              |            |   |       |   |
|-----------|----|-------|---|--------------|------------------------|--------------|---|-------|--------------|------------|---|-------|---|
| GASAR0014 | 2  | -     | - |              | E239K; M241I           | -            |   | A7V   | -            |            | 2 | V183A | - |
| GASAR0059 | 2  | -     | - |              | E239K; M241I           | -            |   | A7V   | <b>D274N</b> | <b>Yes</b> | 2 | V183A | - |
| GASAR0068 | 2  | -     | - |              | E239K; M241I           | -            |   | A7V   | -            |            | 2 | V183A | - |
| GASAR0006 | 3  | -     | - |              | -                      | -            |   | E144K | -            |            | 2 | R227H | - |
| GASAR0008 | 3  | -     | - |              | -                      | -            |   | E144K | -            |            | 2 | R227H | - |
| GASAR0015 | 3  | -     | - |              | -                      | -            |   | E144K | -            |            | 2 | R227H | - |
| GASAR0034 | 3  | -     | - |              | -                      | -            |   | E144K | -            |            | 2 | R227H | - |
| GASAR0051 | 3  | -     | - |              | -                      | -            |   | E144K | -            |            | 2 | R227H | - |
| GASAR0062 | 3  | -     | - |              | -                      | -            |   | E144K | -            |            | 2 | R227H | - |
| GASAR0096 | 3  | -     | - |              | -                      | -            |   | E144K | -            |            | 2 | R227H | - |
| GASAR0026 | 4  | -     | - |              | E239K; M241I           | -            |   | -     | -            |            | 1 | I266V | - |
| GASAR0040 | 4  | -     |   | <b>T104I</b> | <b>Yes</b>             | E239K; M241I | - | -     | -            |            | 1 | I266V | - |
| GASAR0073 | 4  | -     | - |              | E239K; M241I           | -            |   | -     | -            |            | 1 | I266V | - |
| GASAR0102 | 4  | -     | - |              | E239K; M241I           | -            |   | -     | -            |            | 1 | I266V | - |
| GASAR0028 | 5  | V169I | - |              | E239K; M241I;<br>D280G | -            |   | A7V   | -            | <b>?</b>   | 2 | -     | - |
| GASAR0044 | 6  | -     | - |              | E239K; M241I           | -            |   | A7V   | -            |            | 1 | -     | - |
| GASAR0070 | 6  | -     | - |              | E239K; M241I           | -            |   | A7V   | -            |            | 1 | -     | - |
| GASAR0072 | 6  | -     | - |              | E239K; M241I           | -            |   | A7V   | -            |            | 1 | -     | - |
| GASAR0087 | 6  | -     |   | <b>G90C</b>  | <b>Yes</b>             | E239K; M241I | - | A7V   | -            |            | 1 | -     | - |
| GASAR0101 | 6  | -     | - |              | E239K; M241I           | -            |   | A7V   | -            |            | 1 | -     | - |
| GASAR0106 | 6  | -     | - |              | E239K; M241I           | -            |   | A7V   | -            |            | 1 | -     | - |
| GASAR0013 | 12 | E89D  | - |              | -                      | -            |   | -     | -            |            | 1 | -     | - |
| GASAR0030 | 12 | E89D  |   | <b>E72K</b>  | <b>Yes</b>             | -            | - | -     | -            |            | 1 | -     | - |
| GASAR0032 | 12 | E89D  | - |              | -                      | -            |   | -     | -            |            | 1 | -     | - |
| GASAR0053 | 12 | E89D  | - |              | -                      | -            |   | -     | -            |            | 1 | -     | - |
| GASAR0081 | 12 | E89D  | - |              | -                      | -            |   | -     | -            |            | 1 | -     | - |
| GASAR0103 | 12 | E89D  | - |              | -                      | -            |   | -     | -            |            | 1 | -     | - |
| GASAR0104 | 12 | E89D  | - |              | -                      | -            |   | -     | -            |            | 1 | -     | - |
| GASAR0076 | 22 | -     | - |              | -                      | -            |   | -     | -            |            | 1 | -     | - |

|           |    |   |                 |            |              |              |            |             |              |            |       |             |
|-----------|----|---|-----------------|------------|--------------|--------------|------------|-------------|--------------|------------|-------|-------------|
| GASAR0009 | 28 | - | <b>V21A</b>     | <b>Yes</b> | -            | -            |            | T219S       | -            | 1          | -     | -           |
| GASAR0010 | 28 | - | -               |            | -            | -            |            | T219S       | -            | 1          | -     | -           |
| GASAR0020 | 28 | - | -               |            | -            | -            |            | T219S       | -            | 1          | -     | -           |
| GASAR0036 | 28 | - | -               |            | -            | -            |            | T219S       | <b>F198L</b> | <b>Yes</b> | 1     | -           |
| GASAR0045 | 28 | - | -               |            | -            | -            |            | T219S       | -            | 1          | -     | -           |
| GASAR0046 | 28 | - | -               |            | -            | -            |            | T219S       | -            | 1          | -     | -           |
| GASAR0054 | 28 | - | -               |            | -            | -            |            | T219S       | -            | 1          | -     | -           |
| GASAR0055 | 28 | - | -               |            | -            | <b>A100D</b> | <b>Yes</b> | T219S       | -            | 1          | -     | -           |
| GASAR0067 | 28 | - | -               |            | -            | <b>A100D</b> | <b>Yes</b> | T219S       | -            | 1          | -     | -           |
| GASAR0077 | 28 | - | -               |            | -            | -            |            | T219S       | <b>H27Y</b>  | <b>Yes</b> | 1     | -           |
| GASAR0095 | 28 | - | -               |            | -            | -            |            | T219S       | -            | 1          | -     | -           |
| GASAR0111 | 28 | - | -               |            | -            | -            |            | T219S       | -            | 1          | -     | -           |
| GASAR0113 | 28 | - | -               |            | -            | -            |            | T219S       | <b>F198L</b> | <b>Yes</b> | 1     | -           |
| GASAR0035 | 43 | - | -               |            | -            | -            |            | -           | -            | 1          | -     | -           |
| GASAR0012 | 44 | - | <b>F62S</b>     | <b>Yes</b> | -            | -            |            | -           | -            | 2          | N267S | -           |
| GASAR0018 | 44 | - | -               |            | -            | -            |            | -           | -            | 2          | N267S | -           |
| GASAR0083 | 44 | - | -               |            | -            | -            |            | -           | -            | 2          | N267S | -           |
| GASAR0061 | 58 | - | -               |            | E239K; M241I | -            | ?          | T219S       | -            | ?          | 1     | -           |
| GASAR0023 | 75 | - | -               |            | E239K; M241I | -            | -          | -           | -            | 2          | V183A | -           |
| GASAR0025 | 75 | - | -               |            | E239K; M241I | -            | -          | -           | -            | 2          | V183A | -           |
| GASAR0063 | 75 | - | -               |            | E239K; M241I | -            | -          | -           | -            | 2          | V183A | -           |
| GASAR0085 | 75 | - | -               |            | E239K; M241I | -            | -          | -           | -            | 2          | V183A | <b>D91N</b> |
| GASAR0089 | 75 | - | -               |            | E239K; M241I | -            | -          | -           | -            | 2          | V183A | -           |
| GASAR0109 | 75 | - | -               |            | E239K; M241I | -            | -          | -           | -            | 2          | V183A | -           |
| GASAR0038 | 81 | - | -               |            | -            | -            |            | T219S       | -            | ?          | 2     | S201P       |
| GASAR0007 | 87 | - | -               |            | -            | -            |            | -           | -            | 1          | -     | -           |
| GASAR0002 | 89 | - | -               |            | -            | -            |            | E68K; T219S | -            | 1          | -     | -           |
| GASAR0024 | 89 | - | -               |            | -            | -            |            | E68K; T219S | -            | 1          | -     | -           |
| GASAR0031 | 89 | - | <b>217-STOP</b> | <b>Yes</b> | -            | -            |            | E68K; T219S | -            | 1          | -     | -           |

|           |     |   |              |              |   |             |       |   |   |   |   |   |
|-----------|-----|---|--------------|--------------|---|-------------|-------|---|---|---|---|---|
| GASAR0037 | 89  | - | -            | -            | - | E68K; T219S | -     | 1 | - | - |   |   |
| GASAR0050 | 89  | - | -            | -            | - | E68K; T219S | -     | 1 | - | - |   |   |
| GASAR0057 | 89  | - | <b>C222F</b> | <b>Yes</b>   | - | E68K; T219S | -     | 1 | - | - |   |   |
| GASAR0058 | 89  | - | -            | -            | - | E68K; T219S | -     | 1 | - | - |   |   |
| GASAR0064 | 89  | - | -            | -            | - | E68K; T219S | -     | 1 | - | - |   |   |
| GASAR0091 | 89  | - | -            | -            | - | E68K; T219S | -     | 1 | - | - |   |   |
| GASAR0100 | 89  | - | -            | -            | - | E68K; T219S | -     | 1 | - | - |   |   |
| GASAR0017 | 104 | - | -            | E239K; M241I | - | ?           | I199V | - | ? | 1 | - | - |
| GASAR0105 | 134 | - | -            | -            | - | -           | T219S | - | ? | 1 | - | - |

<sup>a</sup> There are two types of *rgg4* based on the DNA sequence

**Supplementary Table 4. Transcriptional gene regulator mutations; *fasABCX***

| Strain    | <i>emm</i><br>-type | <i>fasA</i>          |       |        | <i>fasB</i>          |       |        | <i>fasC</i>          |       |        | <i>fasX</i> (DNA sequence) |       |        |
|-----------|---------------------|----------------------|-------|--------|----------------------|-------|--------|----------------------|-------|--------|----------------------------|-------|--------|
|           |                     | <i>emm</i> -specific | Other | Mutant | <i>emm</i> -specific | Other | Mutant | <i>emm</i> -specific | Other | Mutant | <i>emm</i> -specific       | Other | Mutant |
| GASAR0001 | 1                   | -                    | -     |        | T237I; D375G         | -     |        | -                    | -     |        | -                          | -     |        |
| GASAR0003 | 1                   | -                    | -     |        | T237I; D375G         | -     |        | -                    | -     |        | -                          | -     |        |
| GASAR0011 | 1                   | -                    | -     |        | T237I; D375G         | -     |        | -                    | -     |        | -                          | -     |        |
| GASAR0016 | 1                   | -                    | -     |        | T237I; D375G         | -     |        | -                    | -     |        | -                          | -     |        |
| GASAR0019 | 1                   | -                    | -     |        | T237I; D375G         | -     |        | -                    | -     |        | -                          | -     |        |
| GASAR0021 | 1                   | -                    | -     |        | T237I; D375G         | -     |        | -                    | -     |        | -                          | -     |        |
| GASAR0022 | 1                   | -                    | -     |        | T237I; D375G         | -     |        | -                    | -     |        | -                          | -     |        |
| GASAR0029 | 1                   | -                    | -     |        | T237I; D375G         | -     |        | -                    | -     |        | -                          | -     |        |
| GASAR0033 | 1                   | -                    | -     |        | T237I; D375G         | -     |        | -                    | -     |        | -                          | -     |        |
| GASAR0042 | 1                   | -                    | -     |        | T237I; D375G         | -     |        | -                    | -     |        | -                          | -     |        |
| GASAR0047 | 1                   | -                    | -     |        | T237I; D375G         | -     |        | -                    | -     |        | -                          | -     |        |
| GASAR0048 | 1                   | -                    | -     |        | T237I; D375G         | -     |        | -                    | -     |        | -                          | -     |        |
| GASAR0049 | 1                   | -                    | -     |        | T237I; D375G         | -     |        | -                    | -     |        | -                          | -     |        |
| GASAR0052 | 1                   | -                    | -     |        | T237I; D375G         | -     |        | -                    | -     |        | -                          | -     |        |
| GASAR0065 | 1                   | -                    | -     |        | T237I; D375G         | -     |        | -                    | -     |        | -                          | -     |        |
| GASAR0069 | 1                   | -                    | -     |        | T237I; D375G         | -     |        | -                    | -     |        | -                          | -     |        |
| GASAR0082 | 1                   | -                    | -     |        | T237I; D375G         | -     |        | -                    | -     |        | -                          | -     |        |
| GASAR0086 | 1                   | -                    | -     |        | T237I; D375G         | -     |        | -                    | -     |        | -                          | -     |        |
| GASAR0090 | 1                   | -                    | -     |        | T237I; D375G         | -     |        | -                    | -     |        | -                          | -     |        |
| GASAR0092 | 1                   | -                    | -     |        | T237I; D375G         | -     |        | -                    | -     |        | -                          | -     |        |
| GASAR0093 | 1                   | -                    | -     |        | T237I; D375G         | -     |        | -                    | -     |        | -                          | -     |        |
| GASAR0098 | 1                   | -                    | -     |        | T237I; D375G         | -     |        | -                    | -     |        | -                          | -     |        |
| GASAR0099 | 1                   | -                    | -     |        | T237I; D375G         | -     |        | -                    | -     |        | -                          | -     |        |
| GASAR0110 | 1                   | -                    | -     |        | T237I; D375G         | -     |        | -                    | -     |        | -                          | -     |        |
| GASAR0112 | 1                   | -                    | -     |        | T237I; D375G         | -     |        | -                    | -     |        | -                          | -     |        |
| GASAR0005 | 2                   | -                    | -     |        | -                    | -     |        | -                    | -     |        | -                          | -     |        |

|           |    |       |   |                 |   |                       |   |              |   |
|-----------|----|-------|---|-----------------|---|-----------------------|---|--------------|---|
| GASAR0014 | 2  | -     | - | -               | - | -                     | - | -            | - |
| GASAR0059 | 2  | -     | - | -               | - | -                     | - | -            | - |
| GASAR0068 | 2  | -     | - | -               | - | -                     | - | -            | - |
| GASAR0006 | 3  | -     | - | -               | - | I37V; <b>192-STOP</b> | - | -            | - |
| GASAR0008 | 3  | -     | - | -               | - | I37V; <b>192-STOP</b> | - | -            | - |
| GASAR0015 | 3  | -     | - | -               | - | I37V; <b>192-STOP</b> | - | -            | - |
| GASAR0034 | 3  | -     | - | -               | - | I37V; <b>192-STOP</b> | - | -            | - |
| GASAR0051 | 3  | -     | - | -               | - | I37V; <b>192-STOP</b> | - | -            | - |
| GASAR0062 | 3  | -     | - | -               | - | I37V; <b>192-STOP</b> | - | -            | - |
| GASAR0096 | 3  | -     | - | -               | - | I37V; <b>192-STOP</b> | - | -            | - |
| GASAR0026 | 4  | Q175R | - | N222T           | - | -                     | - | A165G        | - |
| GASAR0040 | 4  | Q175R | - | N222T           | - | -                     | - | A165G        | - |
| GASAR0073 | 4  | Q175R | - | N222T           | - | -                     | - | A165G        | - |
| GASAR0102 | 4  | Q175R | - | N222T           | - | -                     | - | A165G        | - |
| GASAR0028 | 5  | -     | - | -               | - | A298T                 | - | A165G        | - |
| GASAR0044 | 6  | -     | - | L205F           | - | A279T; A298T          | - | A165G        | - |
| GASAR0070 | 6  | -     | - | L205F           | - | A279T; A298T          | - | A165G        | - |
| GASAR0072 | 6  | -     | - | L205F           | - | A279T; A298T          | - | A165G        | - |
| GASAR0087 | 6  | -     | - | L205F           | - | A279T; A298T          | - | A165G        | - |
| GASAR0101 | 6  | -     | - | L205F           | - | A279T; A298T          | - | A165G        | - |
| GASAR0106 | 6  | -     | - | L205F           | - | A279T; A298T          | - | A165G        | - |
| GASAR0013 | 12 | -     | - | -               | - | I37V                  | - | A121G; T200C | - |
| GASAR0030 | 12 | -     | - | -               | - | I37V                  | - | A121G; T200C | - |
| GASAR0032 | 12 | -     | - | -               | - | I37V                  | - | A121G; T200C | - |
| GASAR0053 | 12 | -     | - | -               | - | I37V                  | - | A121G; T200C | - |
| GASAR0081 | 12 | -     | - | -               | - | I37V                  | - | A121G; T200C | - |
| GASAR0103 | 12 | -     | - | -               | - | I37V                  | - | A121G; T200C | - |
| GASAR0104 | 12 | -     | - | -               | - | I37V                  | - | A121G; T200C | - |
| GASAR0076 | 22 | -     | - | A251D;<br>V328M | - | I16T; A298T           | - | A121G; T200C | - |



|           |    |       |   |       |   |             |   |              |   |
|-----------|----|-------|---|-------|---|-------------|---|--------------|---|
| GASAR0009 | 28 | -     | - | -     | - | I37V        | - | T181C        | - |
| GASAR0010 | 28 | -     | - | -     | - | I37V        | - | T181C        | - |
| GASAR0020 | 28 | -     | - | -     | - | I37V        | - | T181C        | - |
| GASAR0036 | 28 | -     | - | -     | - | I37V        | - | T181C        | - |
| GASAR0045 | 28 | -     | - | -     | - | I37V        | - | T181C        | - |
| GASAR0046 | 28 | -     | - | -     | - | I37V        | - | T181C        | - |
| GASAR0054 | 28 | -     | - | -     | - | I37V        | - | T181C        | - |
| GASAR0055 | 28 | -     | - | -     | - | I37V        | - | T181C        | - |
| GASAR0067 | 28 | -     | - | -     | - | I37V        | - | T181C        | - |
| GASAR0077 | 28 | -     | - | -     | - | I37V        | - | T181C        | - |
| GASAR0095 | 28 | -     | - | -     | - | I37V        | - | T181C        | - |
| GASAR0111 | 28 | -     | - | -     | - | I37V        | - | T181C        | - |
| GASAR0113 | 28 | -     | - | -     | - | I37V        | - | T181C        | - |
| GASAR0035 | 43 | -     | - | -     | - | I37V        | - | -            | - |
| GASAR0012 | 44 | -     | - | -     | - | I37V        | - | A165G        | - |
| GASAR0018 | 44 | -     | - | -     | - | I37V        | - | A165G        | - |
| GASAR0083 | 44 | -     | - | -     | - | I37V        | - | A165G        | - |
| GASAR0061 | 58 | E120G | - | T237I | - | L30Q; T380A | - | A165G        | - |
| GASAR0023 | 75 | -     | - | T237I | - | -           | - | G114A; A165G | - |
| GASAR0025 | 75 | -     | - | T237I | - | -           | - | G114A; A165G | - |
| GASAR0063 | 75 | -     | - | T237I | - | -           | - | G114A; A165G | - |
| GASAR0085 | 75 | -     | - | T237I | - | -           | - | G114A; A165G | - |
| GASAR0089 | 75 | -     | - | T237I | - | -           | - | G114A; A165G | - |
| GASAR0109 | 75 | -     | - | T237I | - | -           | - | G114A; A165G | - |
| GASAR0038 | 81 | Q175R | - | -     | - | -           | - | A165G        | - |
| GASAR0007 | 87 | -     | - | -     | - | -           | - | A165G        | - |
| GASAR0002 | 89 | -     | - | -     | - | I37V        | - | C156T        | - |
| GASAR0024 | 89 | -     | - | -     | - | I37V        | - | C156T        | - |
| GASAR0031 | 89 | -     | - | -     | - | I37V        | - | C156T        | - |
| GASAR0037 | 89 | -     | - | -     | - | I37V        | - | C156T        | - |

|           |     |       |   |              |   |                    |   |       |   |
|-----------|-----|-------|---|--------------|---|--------------------|---|-------|---|
| GASAR0050 | 89  | -     | - | -            | - | I37V               | - | C156T | - |
| GASAR0057 | 89  | -     | - | -            | - | I37V               | - | C156T | - |
| GASAR0058 | 89  | -     | - | -            | - | I37V               | - | C156T | - |
| GASAR0064 | 89  | -     | - | -            | - | I37V               | - | C156T | - |
| GASAR0091 | 89  | -     | - | -            | - | I37V               | - | C156T | - |
| GASAR0100 | 89  | -     | - | -            | - | I37V               | - | C156T | - |
| GASAR0017 | 104 | -     | - | S298L        | - | I37V; A298T; T380A | - | -     | - |
| GASAR0105 | 134 | E120G | - | Y231C; T237I | - | L30Q; T380A        | - | A165G | - |

**Supplementary Table 5. Short read assembly statistics**

| Sample    | SRA accession | Total Length | No. of Contigs | Avg Length | Contig | Largest Contig | N50    |
|-----------|---------------|--------------|----------------|------------|--------|----------------|--------|
| GASAR0001 | ERS379344     | 1800855      | 20             | 90042.75   |        | 698066         | 221515 |
| GASAR0002 | ERS361729     | 1753245      | 22             | 79692.95   |        | 487774         | 178167 |
| GASAR0003 | ERS361804     | 1799801      | 15             | 119986.73  |        | 817058         | 306993 |
| GASAR0005 | ERS379345     | 1896083      | 20             | 94804.15   |        | 313472         | 170344 |
| GASAR0006 | ERS361792     | 1861292      | 25             | 74451.68   |        | 516854         | 176303 |
| GASAR0007 | ERS361812     | 1866854      | 38             | 49127.74   |        | 412707         | 130608 |
| GASAR0008 | ERS361800     | 1881861      | 31             | 60705.19   |        | 251356         | 195302 |
| GASAR0009 | ERS361731     | 1894483      | 16             | 118405.19  |        | 537065         | 432303 |
| GASAR0010 | ERS361802     | 1862053      | 15             | 124136.87  |        | 503499         | 236456 |
| GASAR0011 | ERS361803     | 1800734      | 20             | 90036.7    |        | 698542         | 203788 |
| GASAR0012 | ERS361817     | 1842928      | 12             | 153577.33  |        | 383104         | 252730 |
| GASAR0013 | ERS361818     | 1837941      | 37             | 49674.08   |        | 217667         | 163041 |
| GASAR0014 | ERS379346     | 1893354      | 14             | 135239.57  |        | 317472         | 223989 |
| GASAR0015 | ERS379331     | 1819827      | 19             | 95780.37   |        | 516491         | 228022 |
| GASAR0016 | ERS361813     | 1798302      | 18             | 99905.67   |        | 695636         | 231567 |
| GASAR0017 | ERS361734     | 1723981      | 19             | 90735.84   |        | 434004         | 171713 |
| GASAR0018 | ERS361793     | 1842977      | 12             | 153581.42  |        | 325592         | 238078 |
| GASAR0019 | ERS379330     | 1802101      | 19             | 94847.42   |        | 698056         | 208893 |
| GASAR0020 | ERS361742     | 1845845      | 13             | 141988.08  |        | 504268         | 432304 |
| GASAR0021 | ERS379347     | 1800943      | 15             | 120062.87  |        | 818158         | 307005 |
| GASAR0022 | ERS361740     | 1800525      | 16             | 112532.81  |        | 816964         | 320034 |
| GASAR0023 | ERS361739     | 1860954      | 24             | 77539.75   |        | 380462         | 180816 |
| GASAR0024 | ERS379332     | 1737531      | 17             | 102207.71  |        | 495058         | 161261 |
| GASAR0025 | ERS361737     | 1858612      | 12             | 154884.33  |        | 592433         | 380001 |
| GASAR0026 | ERS361736     | 1881488      | 34             | 55337.88   |        | 320137         | 115096 |
| GASAR0028 | ERS361816     | 1850722      | 22             | 84123.73   |        | 285671         | 254450 |
| GASAR0029 | ERS379333     | 1801515      | 20             | 90075.75   |        | 698547         | 208887 |
| GASAR0030 | ERS379348     | 1839772      | 25             | 73590.88   |        | 220154         | 108186 |
| GASAR0031 | ERS361791     | 1778485      | 16             | 111155.31  |        | 488978         | 178840 |
| GASAR0032 | ERS379334     | 1758106      | 22             | 79913.91   |        | 365804         | 131109 |
| GASAR0033 | ERS361750     | 1801206      | 16             | 112575.38  |        | 751806         | 209783 |

|           |           |         |    |           |        |        |
|-----------|-----------|---------|----|-----------|--------|--------|
| GASAR0034 | ERS379335 | 1860469 | 19 | 97919.42  | 516487 | 197943 |
| GASAR0035 | ERS379349 | 1821394 | 23 | 79191.04  | 278433 | 149332 |
| GASAR0036 | ERS361822 | 1854553 | 14 | 132468.07 | 545576 | 232715 |
| GASAR0037 | ERS361747 | 1686938 | 12 | 140578.17 | 629811 | 271014 |
| GASAR0038 | ERS361823 | 1757276 | 20 | 87863.8   | 320345 | 193172 |
| GASAR0040 | ERS379350 | 1825300 | 20 | 91265     | 341272 | 143871 |
| GASAR0042 | ERS379336 | 1800903 | 19 | 94784.37  | 698451 | 203792 |
| GASAR0044 | ERS361752 | 1882911 | 34 | 55379.74  | 247397 | 130884 |
| GASAR0045 | ERS379351 | 1889451 | 12 | 157454.25 | 532672 | 213754 |
| GASAR0046 | ERS361825 | 1846681 | 12 | 153890.08 | 503359 | 433233 |
| GASAR0047 | ERS379352 | 1801297 | 15 | 120086.47 | 698582 | 320074 |
| GASAR0048 | ERS361755 | 1807287 | 18 | 100404.83 | 698262 | 232380 |
| GASAR0049 | ERS379353 | 1800265 | 16 | 112516.56 | 817198 | 208720 |
| GASAR0050 | ERS361757 | 1820979 | 24 | 75874.12  | 420955 | 178215 |
| GASAR0051 | ERS379343 | 1861426 | 26 | 71593.31  | 516856 | 176298 |
| GASAR0052 | ERS379354 | 1801469 | 13 | 138574.54 | 911203 | 911203 |
| GASAR0053 | ERS361796 | 1796412 | 22 | 81655.09  | 242200 | 182665 |
| GASAR0054 | ERS361820 | 1888835 | 13 | 145295    | 532593 | 263156 |
| GASAR0055 | ERS361815 | 1851397 | 9  | 205710.78 | 542564 | 322037 |
| GASAR0057 | ERS361797 | 1710732 | 12 | 142561    | 656587 | 219455 |
| GASAR0058 | ERS361807 | 1686787 | 11 | 153344.27 | 630080 | 271072 |
| GASAR0059 | ERS361760 | 1907188 | 20 | 95359.4   | 315831 | 244498 |
| GASAR0061 | ERS361761 | 1948707 | 13 | 149900.54 | 481456 | 323032 |
| GASAR0062 | ERS361806 | 1859807 | 24 | 77491.96  | 516491 | 227944 |
| GASAR0063 | ERS361762 | 1859201 | 12 | 154933.42 | 491469 | 264926 |
| GASAR0064 | ERS361763 | 1728872 | 12 | 144072.67 | 629996 | 271107 |
| GASAR0065 | ERS361805 | 1801075 | 19 | 94793.42  | 698160 | 274131 |
| GASAR0067 | ERS361824 | 1812251 | 12 | 151020.92 | 503427 | 459651 |
| GASAR0068 | ERS379337 | 1948905 | 20 | 97445.25  | 416996 | 287621 |
| GASAR0069 | ERS361808 | 1801051 | 17 | 105944.18 | 408612 | 203631 |
| GASAR0070 | ERS361795 | 1885238 | 37 | 50952.38  | 261566 | 133329 |
| GASAR0072 | ERS379355 | 1853081 | 23 | 80568.74  | 247447 | 144578 |
| GASAR0073 | ERS361766 | 1872073 | 45 | 41601.62  | 399815 | 148449 |
| GASAR0076 | ERS361768 | 1763744 | 24 | 73489.33  | 259444 | 133358 |

|           |           |         |    |           |        |        |
|-----------|-----------|---------|----|-----------|--------|--------|
| GASAR0077 | ERS361787 | 1855834 | 18 | 103101.89 | 499997 | 213538 |
| GASAR0081 | ERS361769 | 1796585 | 23 | 78112.39  | 223292 | 159099 |
| GASAR0082 | ERS361770 | 1798924 | 17 | 105819.06 | 697641 | 390896 |
| GASAR0083 | ERS361771 | 1842858 | 13 | 141758.31 | 325493 | 238078 |
| GASAR0085 | ERS361772 | 1925702 | 11 | 175063.82 | 470367 | 264942 |
| GASAR0086 | ERS379338 | 1801630 | 18 | 100090.56 | 698569 | 208896 |
| GASAR0087 | ERS361773 | 1819550 | 29 | 62743.1   | 245553 | 144142 |
| GASAR0089 | ERS361789 | 1859259 | 15 | 123950.6  | 531229 | 264064 |
| GASAR0090 | ERS361774 | 1799650 | 19 | 94718.42  | 751714 | 327980 |
| GASAR0091 | ERS361775 | 1713695 | 13 | 131822.69 | 656609 | 237223 |
| GASAR0092 | ERS379339 | 1800568 | 20 | 90028.4   | 697809 | 208886 |
| GASAR0093 | ERS361777 | 1800751 | 19 | 94776.37  | 424753 | 273311 |
| GASAR0095 | ERS379341 | 1984275 | 16 | 124017.19 | 578506 | 214300 |
| GASAR0096 | ERS361811 | 1858779 | 20 | 92938.95  | 516445 | 196888 |
| GASAR0098 | ERS361780 | 1799022 | 17 | 105824.82 | 697916 | 327841 |
| GASAR0099 | ERS361790 | 1800369 | 13 | 138489.92 | 751818 | 431601 |
| GASAR0100 | ERS361781 | 1753127 | 13 | 134855.92 | 465302 | 178220 |
| GASAR0101 | ERS379342 | 1886730 | 37 | 50992.7   | 244616 | 133078 |
| GASAR0102 | ERS361799 | 1850545 | 19 | 97397.11  | 352038 | 255347 |
| GASAR0103 | ERS379356 | 1838206 | 25 | 73528.24  | 287423 | 181675 |
| GASAR0104 | ERS361784 | 1797164 | 25 | 71886.56  | 384021 | 178821 |
| GASAR0105 | ERS361785 | 1745688 | 6  | 290948    | 825458 | 434381 |
| GASAR0106 | ERS361786 | 1885132 | 31 | 60810.71  | 245488 | 143114 |
| GASAR0109 | ERS361735 | 1819205 | 11 | 165382.27 | 550776 | 380384 |
| GASAR0110 | ERS361810 | 1799194 | 14 | 128513.86 | 751437 | 343125 |
| GASAR0111 | ERS361788 | 1888547 | 11 | 171686.09 | 503428 | 309434 |
| GASAR0112 | ERS361821 | 1838080 | 19 | 96741.05  | 468733 | 197708 |
| GASAR0113 | ERS361809 | 1854149 | 11 | 168559    | 545574 | 432184 |

---
